# Supplementary material for: Polarity-Aware Knowledge Graph Reveals Diet-Microbiome-Health Mechanisms with Relevance to Muscle, Immune and Metabolic Aging
Source: Research Square preprint supplement (doi:10.21203/rs.3.rs-8771108/v1), 2026-02-16
Supplement: Supplementary file 1 [file 68cab51b0db572c51fb79b07.docx]

## **Supplementary Table S1. Top 10 Highest Weighted Relationships**

**Paper Title:** Polarity-Aware Knowledge Graph Reveals Diet-Microbiome-Health Mechanisms with Relevance to Muscle, Immune and Metabolic Aging

| **Index** | **Relationship Type** | **Source** | **Target** |
| --- | --- | --- | --- |
| affects_1 | affects | Diet | Gut Microbiota |
| associated_with_1 | associated with | Diet | Gut Microbiota |
| regulates | regulates | Probiotics | Gut Microbiota |
| benefits_1 | benefits | Probiotics | Gut Microbiota |
| benefits_2 | benefits | Mediterranean Diet | Gut Microbiota |
| associated with_2 | associated with | Gut Microbiota | Diseases |
| harms | harms | Antibiotics | Gut microbiota |
| benefits_3 | benefits | Prebiotics | Gut Microbiota |
| affects_2 | affects | Gut Microbiota | Obesity |
| affects_3 | affects | Gut Microbiota | Type 2 Diabetes |

## **Supplementary Table S2. DMH-KG Pilot Study - Comparative Analysis**

**Paper Title:** Polarity-Aware Knowledge Graph Reveals Diet-Microbiome-Health Mechanisms with Relevance to Muscle, Immune and Metabolic Aging

This supplementary table presents a comparative analysis between GPT-4o baseline responses (without knowledge graph augmentation) and DMH-KG enhanced responses (with DMH-KG augmentation). Four representative questions were selected to demonstrate the value of knowledge graph-enhanced retrieval-augmented generation (RAG) for nutritional aging research queries.

| **Question 1: How does gut microbiota dysbiosis contribute to inflammaging and age-related diseases?****GPT-4o Baseline Response** Gut microbiota dysbiosis, which refers to an imbalance in the composition and function of gut microorganisms, plays a significant role in contributing to inflammaging (chronic, low-grade inflammation associated with aging) and age-related diseases. Here's how dysbiosis impacts these processes:  1. Increased Gut Permeability ("Leaky Gut")  - Dysbiosis can disrupt the integrity of the gut lining, leading to increased intestinal permeability. This allows microbial products like lipopolysaccharides (LPS) from gram-negative bacteria to enter the bloodstream.  - LPS triggers systemic inflammation by activating immune cells, contributing to chronic inflammation and inflammaging.  2. Altered Immune System Function  - The gut microbiota plays a critical role in regulating the immune system. Dysbiosis can lead to an overactive or dysregulated immune response, promoting chronic inflammation.  - This persistent inflammation accelerates tissue damage and contributes to the development of age-related diseases such as cardiovascular disease, diabetes, and neurodegenerative disorders.  3. Reduced Production of Anti-inflammatory Metabolites  - Healthy gut microbiota produce beneficial metabolites like short-chain fatty acids (SCFAs), including butyrate, acetate, and propionate, which have anti-inflammatory properties and help maintain gut health.  - Dysbiosis reduces SCFA production, impairing gut barrier function and increasing inflammation.  4. Imbalance in Pro-inflammatory and Anti-inflammatory Microbes  - Dysbiosis often involves an overgrowth of pro-inflammatory bacteria (e.g., certain Proteobacteria) and a reduction in beneficial bacteria (e.g., Bifidobacteria and Lactobacilli).  - This imbalance shifts the gut environment toward a pro-inflammatory state, exacerbating inflammaging and increasing the risk of age-related diseases.  5. Impact on Metabolic Health  - Dysbiosis can disrupt metabolic processes, leading to insulin resistance, obesity, and type 2 diabetes. These conditions are closely linked to chronic inflammation and age-related diseases.  - Altered microbial composition can also affect lipid metabolism, increasing the risk of cardiovascular disease.  6. Influence on Neuroinflammation and Cognitive Decline  - The gut-brain axis connects the gut microbiota to brain health. Dysbiosis can promote neuroinflammation through the release of inflammatory cytokines and microbial metabolites that affect brain function.  - This contributes to age-related neurodegenerative diseases like Alzheimer's and Parkinson's disease.  7. Oxidative Stress  - Dysbiosis can increase oxidative stress by promoting the production of reactive oxygen species (ROS) and reducing antioxidant defenses.  - Oxidative stress damages cells and tissues, accelerating aging and increasing the risk of chronic diseases.  8. Reduced Diversity of Gut Microbiota with Age  - Aging is associated with a natural decline in gut microbiota diversity, which can be exacerbated by dysbiosis. Reduced diversity is linked to impaired resilience of the gut ecosystem and increased susceptibility to inflammation and disease.  Conclusion: Gut microbiota dysbiosis contributes to inflammaging and age-related diseases by promoting chronic inflammation, disrupting gut barrier function, impairing immune regulation, and influencing metabolic and neurological health. Maintaining a healthy gut microbiota through a balanced diet, regular physical activity, and potentially probiotics or prebiotics can help mitigate these effects and support healthy aging. **DMH-KG Enhanced Response** Gut microbiota dysbiosis plays a significant role in contributing to inflammaging (chronic, low-grade inflammation associated with aging) and age-related diseases. The graph evidence provides several mechanistic insights into how dysbiosis impacts health outcomes, particularly through its effects on inflammation, intestinal barrier function, and metabolite production.  Mechanistic Pathways: 1. Dysbiosis → Inflammatory Compounds → Inflammaging:  - Dysbiosis of the gut microbiota is associated with increased levels of toxins such as Bacteroides fragilis toxin, colibactin, and cytolethal distending toxin. These toxins can promote inflammation and epithelial barrier dysfunction, leading to increased intestinal permeability ("leaky gut"). This process exacerbates systemic inflammation, a hallmark of inflammaging.  2. Dysbiosis → Metabolite Profile Alterations → Inflammation and Metabolic Dysfunction:  - Dysbiosis affects the gut metabolite profile, leading to the production of harmful metabolites and reduced beneficial metabolites. For example, dysbiosis can impair short-chain fatty acid (SCFA) production, which is crucial for maintaining gut health and regulating inflammation. Reduced SCFA levels can contribute to immune dysregulation and chronic inflammation, which are key drivers of age-related diseases.  3. Dysbiosis → Intestinal Barrier Dysfunction → Systemic Inflammation:  - Dysbiotic gut microbiota increases epithelial barrier dysfunction and intestinal permeability. This allows microbial products like lipopolysaccharides (LPS) to enter the bloodstream, triggering systemic inflammation. Chronic inflammation is linked to aging-related diseases such as cardiovascular disease, neurodegenerative disorders, and metabolic syndrome.  4. Dysbiosis → Age-Related Diseases:  - Dysbiosis is directly associated with aging-related diseases, including inflammatory bowel disease (IBD), colorectal cancer, obesity, and type 2 diabetes. These conditions are often exacerbated by chronic inflammation and metabolic dysfunction stemming from gut microbiota imbalances.  Contributing Factors to Dysbiosis: 1. Diet:  - A Western diet, characterized by high fat and sugar intake, is a major contributor to dysbiosis. Conversely, diets rich in dietary fiber, whole grains, vegetables, berries, and fermented foods (e.g., yogurt, kefir) benefit gut microbiota and reduce inflammation.  - Specific dietary interventions, such as the Mediterranean diet, have been shown to improve gut microbiota composition and mitigate age-related diseases.  2. Antibiotics:  - Antibiotic use is strongly associated with dysbiosis, as it disrupts the balance of gut microbial communities. This can lead to reduced microbial diversity and increased susceptibility to inflammation and disease.  3. Aging:  - Age-related changes in the gut environment, often linked to dietary insufficiency, contribute to dysbiosis. These changes include reduced microbial diversity and shifts in microbial composition, which impair gut health and exacerbate inflammaging.  Potential Interventions: 1. Probiotics and Prebiotics:  - Probiotics (e.g., *Bifidobacterium* and *Lactobacillus* spp.) and prebiotics (e.g., galactooligosaccharides) can help restore gut microbiota balance, reduce inflammation, and improve intestinal barrier function.  2. Dietary Modifications:  - Diets rich in fiber, flavonoids, omega-3 fatty acids, and fermented foods can promote beneficial gut microbes and reduce inflammation. For example, elderberry juice increases *Bifidobacterium* and *Akkermansia*, which are associated with improved gut health.  3. Targeted Therapies:  - Gut microbiota-targeted diets and interventions, such as intermittent fasting and ketogenic diets, have shown benefits in reducing inflammation and improving metabolic health.  Gaps in Evidence: While the graph provides strong associations between dysbiosis, inflammation, and age-related diseases, specific mechanistic details (e.g., exact pathways linking microbial metabolites to inflammaging) are not fully elucidated. Additionally, the role of individual microbial species in promoting or mitigating inflammaging requires further exploration.  Conclusion: Gut microbiota dysbiosis contributes to inflammaging and age-related diseases through increased production of inflammatory compounds, altered metabolite profiles, and intestinal barrier dysfunction. Addressing dysbiosis through dietary interventions, probiotics, and prebiotics offers promising strategies to mitigate these effects and promote healthy aging. ***Graph Evidence Used*** 2'-fucosyllactose (2'fl) --[increases]--> bacterial genera akkermansia and bacteroides (W: 0.83) acinetobacter, bifidobacterium, and lactobacillus spp --[benefits]--> gut microbiota (W: 0.83) age-related --[causes]--> changes in the gut environment (W: 0.76) age-related changes --[associated_with]--> dietary insufficiency (W: 0.69) antibiotics --[associated_with]--> dysbiosis (W: 1.10) antibiotics --[harms]--> gut microbiota (W: 1.61) berries --[benefits]--> gut health (W: 1.32) diet --[affects]--> gut microbiota (W: 2.30) diet --[associated_with]--> gut microbiota (W: 1.95) dietary fiber --[affects]--> gut microbiota (W: 1.39) dietary fiber --[benefits]--> gut microbiota (W: 1.32) dietary flavonoids --[inhibits]--> expression and secretion of inflammatory factoresistant starch in brain tissue, reduce the damage caused by oxidative stress, clear neural damage proteins and inhibit neuronal apoptosis, thereby ameliorating age-related cognitive disorderesistant starch (W: 0.69) digestive behavior of microalgae nutrients --[associated_with]--> favorable digestive properties and certain components have been shown to benefit gut microbes (W: 0.69) dysbiosis --[associated_with]--> colorectal cancer (W: 1.10) dysbiosis --[associated_with]--> diseases (W: 1.39) dysbiosis --[associated_with]--> inflammatory bowel disease (ibd) (W: 1.10) dysbiosis --[causes]--> development of metabolic diseases (W: 0.76) dysbiosis --[causes]--> pediatric ap (W: 0.76) dysbiosis --[increases]--> covid-19 pathology (W: 0.83) dysbiosis of the gut microbiota --[affects]--> metabolites profile (W: 1.10) ... (91 total triples) **Question 2: Can dietary fiber and SCFA production slow cognitive decline in aging?****GPT-4o Baseline Response** Yes, dietary fiber and the production of short-chain fatty acids (SCFAs) may play a role in slowing cognitive decline in aging. Research suggests that gut health, influenced by dietary fiber intake, is closely linked to brain health through the gut-brain axis. Here's how this works:  1. Dietary Fiber and Gut Microbiota:  - Dietary fiber serves as a prebiotic, meaning it feeds beneficial gut bacteria. These bacteria ferment fiber in the colon, producing SCFAs such as acetate, propionate, and butyrate.  - SCFAs have anti-inflammatory and neuroprotective properties, which may benefit brain health.  2. SCFAs and Brain Health:  - SCFAs can cross the blood-brain barrier and influence brain function. They are known to regulate inflammation, oxidative stress, and energy metabolism, all of which are critical for maintaining cognitive function.  - Butyrate, in particular, has been shown to promote the production of brain-derived neurotrophic factor (BDNF), a protein that supports the survival of neurons and enhances learning and memory.  3. Inflammation and Cognitive Decline:  - Chronic inflammation is a key contributor to cognitive decline and neurodegenerative diseases like Alzheimer's. SCFAs help reduce systemic inflammation by modulating immune responses and maintaining gut barrier integrity, which prevents harmful substances from entering the bloodstream and affecting the brain.  4. Aging and the Gut-Brain Axis:  - As people age, the diversity of gut microbiota often decreases, which can impair SCFA production. Consuming a diet rich in fiber (e.g., from fruits, vegetables, whole grains, legumes) can help maintain a healthy gut microbiome and support SCFA production, potentially mitigating age-related cognitive decline.  Supporting Evidence:  - Studies in both animals and humans have shown that diets high in fiber are associated with better cognitive performance and reduced risk of neurodegenerative diseases.  - Research is ongoing, but the connection between gut health, SCFA production, and brain health is increasingly recognized as a promising area for preventing or slowing cognitive decline.  Practical Recommendations:  - To support gut health and SCFA production, aim to consume 25–38 grams of dietary fiber per day (depending on age, sex, and activity level).  - Include a variety of fiber-rich foods such as vegetables, fruits, whole grains, nuts, seeds, and legumes in your diet.  While more research is needed to fully understand the mechanisms, maintaining a fiber-rich diet is a simple and effective strategy to support both gut and brain health as you age. **DMH-KG Enhanced Response** Yes, dietary fiber and short-chain fatty acid (SCFA) production can potentially slow cognitive decline in aging, based on the graph evidence. Here's the mechanistic path and supporting details:  Mechanistic Path: 1. Dietary Fiber → Gut Microbiota:  - Dietary fiber is shown to regulate, benefit, and increase the diversity of gut microbiota (W: 1.10, 1.32, 0.83). Specifically, fermentable dietary fibers improve gut microbiota composition and metabolic function (W: 0.83).  - High-dietary fiber diets increase beneficial bacteria and promote SCFA production (W: 0.83).  2. Gut Microbiota → SCFA Production:  - Certain bacterial genera, such as those in the family Lachnospiraceae (e.g., Anaerostipes, Fusicatenibacter, and Roseburia), are associated with increased SCFA production (W: 0.83).  - Fermentation of soluble dietary fibers and dietary fiber-enriched foods (e.g., rolls, bread) increases SCFA concentrations (W: 0.83).  3. SCFA → Cognitive Outcomes:  - SCFAs benefit gastrointestinal and neurological disorders (W: 0.83) and are linked to improved health outcomes, including glucose homeostasis and metabolic efficiency (W: 0.83).  - Beneficial gut bacteria, which are supported by SCFA production, are directly associated with improved cognitive outcomes (W: 0.83).  4. Cognitive Decline → Aging:  - Aging is associated with cognitive decline (W: 0.69), but dietary interventions, including high dietary fiber intake, are linked to improved cognitive function and reduced risk of cognitive decline (W: 0.69, 0.83).  Supporting Evidence: - Dietary Fiber:  - Dietary fiber-rich diets increase SCFA production through bacterial fermentation in the colon (W: 0.83).  - High-dietary fiber diets promote recovery of gut microbiota and increase beneficial bacteria (W: 0.83).  - SCFA Production:  - SCFAs are beneficial for neurological health and cognitive functioning (W: 0.83).  - Prebiotics, which enhance SCFA production, are shown to benefit cognitive functioning (W: 0.83).  - Gut-Brain Axis:  - Dietary flavonoids and polyphenols, often found in fiber-rich diets, benefit cognitive function through the gut-brain axis (W: 0.83).  Gaps in Evidence: While the graph strongly supports the role of dietary fiber and SCFA production in improving gut health and cognitive outcomes, it does not explicitly detail the molecular mechanisms by which SCFAs influence neurotransmitter production or brain function. For example: - The link between SCFAs and neurotransmitters like serotonin and dopamine is implied but not directly shown in the graph. - The evidence does not specify which SCFAs (e.g., butyrate, acetate, propionate) are most critical for cognitive health.  Conclusion: Dietary fiber supports gut microbiota diversity and SCFA production, which in turn benefits cognitive outcomes, particularly in aging populations. While the graph provides strong evidence for this relationship, further research into specific SCFA mechanisms and their direct impact on neurotransmitter synthesis and brain health would strengthen the understanding of this pathway. ***Graph Evidence Used*** ""dysbiotic"" state --[causes]--> inadequate production of needed neurotransmitteresistant starch such as serotonin and dopamine (W: 0.76) 2'-fucosyllactose (2'fl) --[increases]--> bacterial genera akkermansia and bacteroides (W: 0.83) abundances of genera in the faminterleukiny lachnospiraceae (anaerostipes, fusicatenibacter and roseburia) --[increases]--> short-chain fatty acids (scfas) (W: 0.83) acinetobacter, bifidobacterium, and lactobacillus spp --[benefits]--> gut microbiota (W: 0.83) age --[associated_with]--> effectiveness of dietary interventions (W: 1.10) algae enriched sourdough breads --[benefits]--> production of bioactive volatinterleukine organic fatty acids (W: 0.83) algae enriched sourdough breads --[benefits]--> production of bioactives terpenes (W: 0.83) beneficial gut bacteria --[increases]--> cognitive outcomes (W: 0.83) bl21 and pp06 --[increases]--> anti-tumor efficolorectal cancery (W: 0.83) caloric restriction, fasting, protein restriction, and amino acid restriction --[causes]--> improves metabolic syndrome, inflammatory bowel disease, and cognitive impairment (W: 0.76) choline --[benefits]--> cognitive function (W: 0.83) citrus polyphenols --[increases]--> short-chain fatty acids (scfas) (W: 0.83) diet --[affects]--> inflammation (W: 1.10) diet regimes --[affects]--> cognitive decline (W: 0.69) dietary changes --[affects]--> gut microbiota (W: 1.10) dietary cholesterol --[associated_with]--> gut microbiota (W: 1.10) dietary fiber (df) --[benefits]--> health (W: 0.83) dietary fiber --[affects]--> gut microbiota (W: 1.39) dietary fiber --[benefits]--> gut microbiota (W: 1.32) dietary fiber --[benefits]--> gut microbiota population and diversity (W: 0.83) ... (158 total triples) **Question 3: What is the role of gut-brain axis in age-related neurodegeneration?****GPT-4o Baseline Response** The gut-brain axis plays a significant role in age-related neurodegeneration, as it represents the bidirectional communication network between the gastrointestinal system and the central nervous system (CNS). This connection is mediated by neural, hormonal, immune, and metabolic pathways, and disruptions in this axis can contribute to neurodegenerative diseases such as Alzheimer's disease, Parkinson's disease, and other age-related cognitive impairments. Here are key aspects of the gut-brain axis in relation to neurodegeneration:  1. Gut Microbiota and Neuroinflammation  - The gut microbiota, a diverse community of microorganisms in the gastrointestinal tract, influences brain health through the production of metabolites, neurotransmitters, and immune signaling molecules.  - Dysbiosis (imbalance in gut microbiota) can lead to increased intestinal permeability ("leaky gut"), allowing harmful substances like lipopolysaccharides (LPS) to enter the bloodstream. These substances can trigger systemic inflammation and neuroinflammation, which are key contributors to neurodegeneration.  2. Chronic Inflammation  - Aging is associated with a state of low-grade chronic inflammation, often referred to as "inflammaging." Dysregulated gut microbiota can exacerbate this process by promoting the release of pro-inflammatory cytokines.  - Chronic inflammation can damage neurons, impair synaptic function, and accelerate the progression of neurodegenerative diseases.  3. Microbial Metabolites and Brain Function  - Gut microbes produce metabolites such as short-chain fatty acids (SCFAs), including butyrate, acetate, and propionate, which have neuroprotective effects. SCFAs can regulate inflammation, maintain the integrity of the blood-brain barrier, and support neuronal health.  - In aging, reduced production of beneficial metabolites due to gut dysbiosis may impair brain function and increase vulnerability to neurodegeneration.  4. Impact on the Blood-Brain Barrier  - The gut-brain axis influences the integrity of the blood-brain barrier (BBB), which protects the brain from harmful substances. Dysbiosis and inflammation can compromise BBB function, allowing neurotoxic molecules to enter the brain and contribute to neurodegeneration.  5. Role in Protein Aggregation  - Neurodegenerative diseases like Alzheimer's and Parkinson's are characterized by the accumulation of misfolded proteins (e.g., amyloid-beta and alpha-synuclein). Gut dysbiosis and inflammation may promote the aggregation of these proteins and their spread from the gut to the brain via the vagus nerve.  6. Vagus Nerve Communication  - The vagus nerve is a critical component of the gut-brain axis, transmitting signals between the gut and brain. Impaired vagus nerve function due to aging or gut dysbiosis can disrupt this communication and contribute to neurodegenerative processes.  7. Diet and Lifestyle Factors  - Diet and lifestyle significantly influence the gut microbiota and, consequently, the gut-brain axis. A diet rich in fiber, polyphenols, and omega-3 fatty acids can support a healthy gut microbiota and reduce inflammation, potentially mitigating age-related neurodegeneration.  8. Potential Therapeutic Interventions  - Modulating the gut microbiota through probiotics, prebiotics, dietary changes, and fecal microbiota transplantation (FMT) is being explored as a potential strategy to prevent or slow neurodegeneration.  - Targeting the gut-brain axis may help reduce inflammation, improve cognitive function, and protect against age-related brain disorders.  In summary, the gut-brain axis plays a crucial role in maintaining brain health, and its dysfunction can contribute to the development and progression of age-related neurodegenerative diseases. Understanding and modulating this connection may offer promising avenues for prevention and treatment. **DMH-KG Enhanced Response** The gut-brain axis plays a significant role in age-related neurodegeneration, as evidenced by the relationships in the graph. Here is a synthesis of the mechanistic pathways and relevant factors:  Mechanistic Pathways: 1. Age-related changes in the gut environment:  - Aging is associated with changes in the gut microbiota composition, often leading to dysbiosis (imbalanced gut microbiota). Dysbiosis is linked to increased levels of toxins (e.g., Bacteroides fragilis toxin, colibactin, and cytolethal distending toxin), which can negatively impact brain health through the gut-brain axis.  2. Gut-brain axis and neuroinflammation:  - Dysbiosis affects the gut-brain axis signaling, which is crucial for maintaining cognitive function. Dysbiosis can impair the production of beneficial metabolites (e.g., short-chain fatty acids like butyrate) that have anti-inflammatory and neuroprotective effects. Reduced butyrate levels may exacerbate neuroinflammation, a key driver of neurodegeneration.  3. Dietary interventions modulating the gut-brain axis:  - Certain diets, such as the Mediterranean diet, dietary flavonoids, and brain anti-inflammatory nutrition (BRAIN) diet, are associated with modulation of the gut microbiota and the gut-brain axis. These diets reduce inflammation and oxidative stress, which are critical in preventing age-related cognitive decline.  - For example, dietary flavonoids benefit cognitive function through the gut-brain axis by inhibiting inflammatory factors and reducing oxidative stress in brain tissue.  4. Microbial metabolites and neuroprotection:  - Higher dietary fiber intake increases the abundance of butyrate-producing bacteria, which produce short-chain fatty acids (SCFAs) like butyrate. SCFAs are known to support neuronal health, reduce oxidative stress, and inhibit neuronal apoptosis, thereby ameliorating age-related cognitive disorders.  5. Psychobiotics and probiotics:  - Psychobiotics (probiotics targeting mental health) benefit the gut-brain axis by improving gut microbiota composition and supporting cognitive function. Probiotics increase the abundance of beneficial bacteria such as Lactobacillus and Bifidobacterium, which are associated with improved gut-brain signaling and reduced inflammation.  Evidence Supporting the Role of Gut-Brain Axis in Neurodegeneration: - Gut microbiota dysbiosis is associated with aging-related diseases, including neurodegenerative conditions. - Dysbiosis impairs the gut-brain axis, which affects cognitive function, mood, and serotonin metabolism. - Diets rich in antioxidants, dietary fiber, and phytonutrients (e.g., Mediterranean diet) reduce inflammation and support healthy aging, including brain health. - Coffee intake (containing caffeine, chlorogenic acids, and melanoidins) has neuroprotective and anti-inflammatory effects, partly through gut microbiota modulation.  Gaps in Evidence: - While the graph highlights the association between dysbiosis and neurodegeneration, specific microbial taxa or metabolites directly linked to age-related neurodegeneration are not fully detailed. - The role of specific dietary interventions (e.g., resistant starch, probiotics) in reversing dysbiosis and their direct impact on neurodegeneration requires further exploration.  Conclusion: The gut-brain axis is a critical mediator in age-related neurodegeneration. Dysbiosis, driven by aging and dietary insufficiencies, disrupts gut-brain signaling, leading to neuroinflammation and cognitive decline. Dietary interventions, such as the Mediterranean diet, dietary flavonoids, and probiotics, can modulate the gut microbiota, enhance SCFA production, and reduce inflammation, offering potential strategies to mitigate neurodegenerative processes. ***Graph Evidence Used*** age --[associated_with]--> effectiveness of dietary interventions (W: 1.10) age-related --[causes]--> changes in the gut environment (W: 0.76) age-related changes --[associated_with]--> dietary insufficiency (W: 0.69) altered gut microbiota, or dysbiosis --[associated_with]--> impairment of brain development through gut microbiota-gut brain axis (mgb axis) mechanism (W: 0.69) antibiotics --[associated_with]--> dysbiosis (W: 1.10) antidepressants --[affects]--> gut microbiota-gut-brain axis (W: 0.69) autism spectrum disorder (asd) --[associated_with]--> obesity (W: 1.10) brain anti-inflammatory nutrition (brain) diet --[associated_with]--> modulation of the gut microbiota and the gut-brain axis (W: 0.69) coffee intake --[benefits]--> neuroprotective (caffeine, chlorogenic acids and melanoidins), anti-inflammatory (caffeine, chlorogenic acids, melanoidins, diterpenes), gut microbiota modulation (polysaccharides, melanoidins, chlorogenic acids), immunostimulatory (polysaccharides), antidiabetic (trigonelline, chlorogenic acids), antihypertensive (chlorogenic acids) and hypocholesterolemic (polysaccharides, chlorogenic acids, lipids) (W: 0.83) diet --[affects]--> inflammation (W: 1.10) dietary blueberries --[increases]--> bacterial taxa that are negatively associated with circulating tma/trimethylamine n-oxide suggesting the role of gut microbes (W: 0.83) dietary fiber intake --[benefits]--> cell survival (W: 0.83) dietary fiber intake --[benefits]--> colon function (W: 0.83) dietary flavonoids --[benefits]--> cognitive function through the gut-brain axis (W: 0.83) dietary flavonoids --[inhibits]--> expression and secretion of inflammatory factoresistant starch in brain tissue, reduce the damage caused by oxidative stress, clear neural damage proteins and inhibit neuronal apoptosis, thereby ameliorating age-related cognitive disorderesistant starch (W: 0.69) diets high in antioxidants, dietary fiber, and phytonutrients --[benefits]--> skin health (W: 0.83) docosahexaenoic acid (dha) --[regulates]--> hypothalamic-pituitary-adrenal axis (W: 0.69) dysbiosis --[associated_with]--> colorectal cancer (W: 1.10) dysbiosis --[associated_with]--> diseases (W: 1.39) dysbiosis --[associated_with]--> inflammatory bowel disease (ibd) (W: 1.10) ... (110 total triples) **Question 4: How does red meat consumption affect inflammation through gut microbes?****GPT-4o Baseline Response** Red meat consumption can influence inflammation in the body through its interaction with gut microbes. The gut microbiome plays a critical role in processing dietary components, and certain compounds in red meat can lead to the production of metabolites that may promote inflammation. Here’s how this process works:  1. Production of Trimethylamine-N-Oxide (TMAO):  - Red meat contains carnitine, a compound that gut microbes metabolize into trimethylamine (TMA). TMA is then converted in the liver into trimethylamine-N-oxide (TMAO).  - Elevated levels of TMAO have been associated with increased inflammation, atherosclerosis, and cardiovascular disease. TMAO may contribute to inflammatory processes by affecting cholesterol metabolism and promoting the formation of plaques in blood vessels.  2. Saturated Fat Content:  - Red meat, especially processed and fatty cuts, is high in saturated fats. Diets rich in saturated fats can alter the gut microbiome composition, favoring the growth of pro-inflammatory bacteria.  - These changes in the microbiome can lead to increased production of lipopolysaccharides (LPS), which are inflammatory molecules released by certain gut bacteria. LPS can enter the bloodstream and trigger systemic inflammation.  3. Impact on Gut Microbial Diversity:  - Diets high in red meat may reduce gut microbial diversity, which is essential for maintaining a healthy gut and immune system. A less diverse microbiome is often linked to increased inflammation and susceptibility to chronic diseases.  4. N-nitroso Compounds and Processed Red Meat:  - Processed red meats (like bacon, sausage, and deli meats) often contain nitrates and nitrites, which gut microbes can convert into N-nitroso compounds. These compounds have been associated with gut inflammation and an increased risk of colorectal cancer.  5. Iron Content (Heme Iron):  - Red meat is rich in heme iron, which can be metabolized by gut bacteria into potentially harmful compounds. These compounds may damage the gut lining, promote oxidative stress, and contribute to inflammation.  6. Interaction with Gut Barrier Function:  - A diet high in red meat may impair gut barrier integrity, allowing inflammatory molecules and bacterial byproducts to leak into the bloodstream (a phenomenon known as "leaky gut"). This can further exacerbate systemic inflammation.  Recommendations to Mitigate Inflammation:  - Balance red meat consumption: Limit intake of red and processed meats and opt for lean cuts or plant-based protein sources.  - Increase fiber intake: Fiber-rich foods (like fruits, vegetables, and whole grains) promote the growth of anti-inflammatory gut bacteria and improve gut health.  - Include anti-inflammatory foods: Omega-3 fatty acids (found in fish, flaxseeds, and walnuts) and polyphenols (found in berries, green tea, and olive oil) can help counteract inflammation.  - Diversify protein sources: Incorporate plant-based proteins (like legumes, tofu, and tempeh) and lean poultry or fish into your diet.  In summary, while moderate consumption of red meat may not pose significant risks for healthy individuals, excessive intake—especially of processed red meat—can negatively affect gut microbes and promote inflammation. Balancing red meat with a diverse, fiber-rich diet can help maintain gut health and reduce inflammation. **DMH-KG Enhanced Response** The graph evidence provides partial insights into how red meat consumption may influence inflammation through gut microbes. Here's a synthesis based on the available data:  Mechanistic Pathway: Red Meat → Gut Microbiota → Inflammation 1. Red Meat and Gut Microbiota:  - Higher red meat intake is associated with changes in gut microbiota composition, specifically an increase in Firmicutes, Bacteroidetes, Actinobacteria, and Proteobacteria families (W: 0.69). These microbial shifts can contribute to dysbiosis, which is linked to inflammation.  - Excessive red and processed meat intake is associated with gut disorders (W: 0.69), which may include dysbiosis and increased gut permeability.  2. Gut Microbiota and Inflammation:  - Dysbiosis, or an imbalance in gut microbiota, is associated with promoting inflammation (W: 0.83). This can occur through mechanisms such as increased gut permeability, allowing bacterial endotoxins (e.g., lipopolysaccharides) to enter the bloodstream and trigger systemic inflammation.  - Bacterial overgrowth in the small intestine can also lead to systemic inflammation (W: 0.83), which may be exacerbated by the microbial changes linked to high red meat consumption.  3. Specific Metabolites:  - Red meat contains L-carnitine, which is metabolized by gut microbes into trimethylamine (TMA). TMA is further converted in the liver to trimethylamine N-oxide (TMAO), a compound associated with inflammation and cardiovascular disease risk. However, the graph evidence does not explicitly link TMAO to inflammation in this dataset.  4. Inflammatory Outcomes:  - High intake of red and processed meat is associated with an increased incidence and progression of inflammatory bowel disease (IBD) (W: 0.83). Chronic gut inflammation is also linked to obesity (W: 0.76) and metabolic dysfunction (W: 0.76).  Gaps in Evidence: - While the graph suggests that red meat consumption alters gut microbiota and is associated with inflammation, it does not provide direct evidence of specific microbial species or metabolites (e.g., TMAO) driving inflammation. - The role of specific microbial taxa (e.g., Firmicutes, Bacteroidetes) in inflammation is not detailed in the graph. - The evidence does not explicitly connect red meat consumption to short-chain fatty acids (SCFAs), which are generally anti-inflammatory, nor does it clarify whether red meat consumption reduces beneficial SCFA-producing microbes.  Summary: Red meat consumption is associated with changes in gut microbiota composition, including an increase in certain bacterial families (e.g., Firmicutes, Bacteroidetes, Actinobacteria, Proteobacteria). These changes can lead to dysbiosis, gut permeability, and systemic inflammation, potentially through mechanisms involving bacterial endotoxins like lipopolysaccharides. Additionally, red meat contains L-carnitine, which gut microbes metabolize into TMA and subsequently TMAO, a compound linked to inflammation. However, the graph lacks direct evidence connecting specific microbial taxa or metabolites to inflammation in the context of red meat consumption. ***Graph Evidence Used*** 2'-fl-lfh consumption --[increases]--> short-chain fatty acidss-producing genus prevotella (W: 0.83) altered gut microbiota, or dysbiosis --[associated_with]--> impairment of brain development through gut microbiota-gut brain axis (mgb axis) mechanism (W: 0.69) anti-inflammatory and antioxidative nutrients --[causes]--> reduction and control of the physiological stress of tissues during high-intensity physical sports (W: 0.76) antibiotics --[harms]--> gut microbiota (W: 1.61) bacterial overgrowth in the small intestine --[increases]--> systemic inflammation (W: 0.83) berries --[benefits]--> gut health (W: 1.32) bifidobacterium animalis subsp. lactis lpl-rh --[increases]--> postoperative nutrition indexes (red blood cell counts, hemoglobin level, p < 0.05) (W: 0.83) brown, red and green seaweed --[causes]--> gut modulation (W: 0.76) changes in the gut environment --[causes]--> chronic inflammation, metabolic dysfunction, and interleukinlness (W: 0.76) chestnut chiffon cake --[causes]--> increase the resistant component, scavenging activity and ferric reducing antioxidant power, surprisingly decrease predicted glycemic index to 54.05-57.28, and reduce the acetate/propionate ratio and firmicutes/bacteroidetes value for human gut microbiota as well (W: 0.76) chronic gut inflammation --[causes]--> obesity (W: 0.76) chronic inflammation, metabolic dysfunction, and interleukinlness --[increases]--> risk of neurodegenerative disorderesistant starch (W: 0.83) consumption of diets rich in fats and carbohydrates --[causes]--> endotoxins, such as lipopolysaccharides produced by detrimental bacteria, to permeate through portal veins (W: 0.76) consumption of eggs --[benefits]--> dietary habits (W: 0.83) consumption of eggs --[increases]--> intake of monounsaturated and polyunsaturated fatty acids (W: 0.83) consumption of fermented minterleukink --[benefits]--> gut microbiota (W: 0.83) consumption of food rich in dietary fibers (dfs) --[benefits]--> human health (W: 0.83) consumption of pepper --[increases]--> verrucomicrobia (W: 0.83) consumption of traditional prebiotics --[benefits]--> health (W: 0.83) corticosteroids --[causes]--> changes in beta diversity with enrichment of ascribed beneficial taxa, including blautia, anaerostipes, and bifidobacterium, as well as an increase in predicted butyrate synthesis (W: 0.76) ... (111 total triples) |
| --- |

## **Supplementary Table S3. Pathway Validation Dataset for DMH-KG Entity Recall***

**Paper Title:** Polarity-Aware Knowledge Graph Reveals Diet-Microbiome-Health Mechanisms with Relevance to Muscle, Immune and Metabolic Aging

| **Reference Pathway** | **Database** | **Pathway ID** | **DMH-KG Pathway** | **Marker Type** | **Reference Entity** | | **Detected** | **DMH-KG Entity** |
| --- | --- | --- | --- | --- | --- | --- | --- | --- |
| Butanoate Metabolism | KEGG | map00650 | Fiber Fermentation | Dietary Input | | dietary fiber | Yes | dietary fiber |
| Butanoate Metabolism | KEGG | map00650 | Fiber Fermentation | Dietary Input | | resistant starch | Yes | resistant starch |
| Butanoate Metabolism | KEGG | map00650 | Fiber Fermentation | Dietary Input | | pectin | Yes | pectin |
| Butanoate Metabolism | KEGG | map00650 | Fiber Fermentation | Dietary Input | | inulin | Yes | inulin |
| Butanoate Metabolism | KEGG | map00650 | Fiber Fermentation | Dietary Input | | cellulose | Yes | cellulose |
| Butanoate Metabolism | KEGG | map00650 | Fiber Fermentation | Metabolite | | butyrate | Yes | butyrate |
| Butanoate Metabolism | KEGG | map00650 | Fiber Fermentation | Metabolite | | acetate | Yes | acetate |
| Butanoate Metabolism | KEGG | map00650 | Fiber Fermentation | Metabolite | | propionate | Yes | propionate |
| Butanoate Metabolism | KEGG | map00650 | Fiber Fermentation | Metabolite | | succinate | Yes | succinate |
| Butanoate Metabolism | KEGG | map00650 | Fiber Fermentation | Metabolite | | short-chain fatty acids | Yes | short-chain fatty acids |
| Butanoate Metabolism | KEGG | map00650 | Fiber Fermentation | Microbiome | | Faecalis bacterium | Yes | faecalibacterium |
| Butanoate Metabolism | KEGG | map00650 | Fiber Fermentation | Microbiome | | roseburia | Yes | roseburia |
| Butanoate Metabolism | KEGG | map00650 | Fiber Fermentation | Microbiome | | eubacterium | Yes | eubacterium |
| Butanoate Metabolism | KEGG | map00650 | Fiber Fermentation | Microbiome | | coprococcus | Yes | coprococcus |
| Secondary Bile Acid Biosynthesis | KEGG | map00121 | Bile Acid Transformation | Dietary Input | | high-fat diet | Yes | high-fat diet |
| Secondary Bile Acid Biosynthesis | KEGG | map00121 | Bile Acid Transformation | Dietary Input | | fat | Yes | fat |
| Secondary Bile Acid Biosynthesis | KEGG | map00121 | Bile Acid Transformation | Metabolite | | cholesterol | Yes | cholesterol |
| Secondary Bile Acid Biosynthesis | KEGG | map00121 | Bile Acid Transformation | Metabolite | | bile acids | Yes | bile acids |
| Secondary Bile Acid Biosynthesis | KEGG | map00121 | Bile Acid Transformation | Metabolite | | cholic acid | Yes | cholic acid |
| Secondary Bile Acid Biosynthesis | KEGG | map00121 | Bile Acid Transformation | Metabolite | | deoxycholic acid | Yes | deoxycholic acid |
| Secondary Bile Acid Biosynthesis | KEGG | map00121 | Bile Acid Transformation | Metabolite | | lithocholic acid | Yes | lithocholic acid |
| Secondary Bile Acid Biosynthesis | KEGG | map00121 | Bile Acid Transformation | Metabolite | | secondary bile acids | Yes | secondary bile acids |
| Secondary Bile Acid Biosynthesis | KEGG | map00121 | Bile Acid Transformation | Microbiome | | clostridium | Yes | clostridium |
| Secondary Bile Acid Biosynthesis | KEGG | map00121 | Bile Acid Transformation | Microbiome | | eubacterium | Yes | eubacterium |
| Secondary Bile Acid Biosynthesis | KEGG | map00121 | Bile Acid Transformation | Microbiome | | bacteroides | Yes | bacteroides |
| Secondary Bile Acid Biosynthesis | KEGG | map00121 | Bile Acid Transformation | Microbiome | | lactobacillus | Yes | lactobacillus |
| Secondary Bile Acid Biosynthesis | KEGG | map00121 | Bile Acid Transformation | Metabolite | | primary bile acids | Yes | primary bile acids |
| Amine-derived Hormones | Reactome | R-HSA-8964043 | TMAO Signalling | Dietary Input | | red meat | Yes | red meat |
| Amine-derived Hormones | Reactome | R-HSA-8964043 | TMAO Signalling | Dietary Input | | eggs | Yes | eggs |
| Amine-derived Hormones | Reactome | R-HSA-8964043 | TMAO Signalling | Dietary Input | | fish | Yes | fish |
| Amine-derived Hormones | Reactome | R-HSA-8964043 | TMAO Signalling | Metabolite | | choline | Yes | choline |
| Amine-derived Hormones | Reactome | R-HSA-8964043 | TMAO Signalling | Metabolite | | carnitine | Yes | carnitine |
| Amine-derived Hormones | Reactome | R-HSA-8964043 | TMAO Signalling | Metabolite | | betaine | Yes | betaine |
| Amine-derived Hormones | Reactome | R-HSA-8964043 | TMAO Signalling | Metabolite | | lecithin | No | nan |
| Amine-derived Hormones | Reactome | R-HSA-8964043 | TMAO Signalling | Metabolite | | trimethylamine | Yes | trimethylamine |
| Amine-derived Hormones | Reactome | R-HSA-8964043 | TMAO Signalling | Metabolite | | tma | Yes | trimethylamine |
| Amine-derived Hormones | Reactome | R-HSA-8964043 | TMAO Signalling | Metabolite | | trimethylamine n-oxide | Yes | trimethylamine n-oxide |
| Amine-derived Hormones | Reactome | R-HSA-8964043 | TMAO Signalling | Metabolite | | tmao | Yes | trimethylamine n-oxide |
| Amine-derived Hormones | Reactome | R-HSA-8964043 | TMAO Signalling | Microbiome | | prevotella | Yes | prevotella |
| Amine-derived Hormones | Reactome | R-HSA-8964043 | TMAO Signalling | Microbiome | | clostridium | Yes | clostridium |
| Toll-Like Receptor Cascades | Reactome | R-HSA-168898 | Inflammation/ Immunity | Metabolite | | lipopolysaccharide | Yes | lipopolysaccharide |
| Toll-Like Receptor Cascades | Reactome | R-HSA-168898 | Inflammation/ Immunity | Metabolite | | lps | Yes | lipopolysaccharide |
| Toll-Like Receptor Cascades | Reactome | R-HSA-168898 | Inflammation/ Immunity | Gene | | tlr4 | No | nan |
| Toll-Like Receptor Cascades | Reactome | R-HSA-168898 | Inflammation/ Immunity | Gene | | toll-like receptor | No | nan |
| Toll-Like Receptor Cascades | Reactome | R-HSA-168898 | Inflammation/ Immunity | Gene | | nf-kb | Yes | nf-kappa b |
| Toll-Like Receptor Cascades | Reactome | R-HSA-168898 | Inflammation/ Immunity | Outcome | | cytokine | Yes | cytokine |
| Toll-Like Receptor Cascades | Reactome | R-HSA-168898 | Inflammation/ Immunity | Outcome | | inflammation | Yes | inflammation |
| Toll-Like Receptor Cascades | Reactome | R-HSA-168898 | Inflammation/ Immunity | Outcome | | tnf | Yes | tumor necrosis factor |
| Toll-Like Receptor Cascades | Reactome | R-HSA-168898 | Inflammation/ Immunity | Outcome | | tnf-alpha | Yes | tumor necrosis factor |
| Toll-Like Receptor Cascades | Reactome | R-HSA-168898 | Inflammation/ Immunity | Outcome | | tumor necrosis factor | Yes | tumor necrosis factor |
| Toll-Like Receptor Cascades | Reactome | R-HSA-168898 | Inflammation/ Immunity | Outcome | | il-6 | Yes | interleukin |
| Toll-Like Receptor Cascades | Reactome | R-HSA-168898 | Inflammation/ Immunity | Outcome | | interleukin | Yes | interleukin |
| Toll-Like Receptor Cascades | Reactome | R-HSA-168898 | Inflammation/ Immunity | Outcome | | metabolic endotoxemia | Yes | metabolic endotoxemia |
| Toll-Like Receptor Cascades | Reactome | R-HSA-168898 | Inflammation/ Immunity | Outcome | | gut barrier | Yes | gut barrier |
| Tryptophan Metabolism | KEGG | map00380 | Tryptophan Metabolism | Dietary Input | | tryptophan | Yes | tryptophan |
| Tryptophan Metabolism | KEGG | map00380 | Tryptophan Metabolism | Metabolite | | serotonin | Yes | serotonin |
| Tryptophan Metabolism | KEGG | map00380 | Tryptophan Metabolism | Metabolite | | kynurenine | Yes | kynurenine |
| Tryptophan Metabolism | KEGG | map00380 | Tryptophan Metabolism | Metabolite | | indole | Yes | indole |
| Tryptophan Metabolism | KEGG | map00380 | Tryptophan Metabolism | Metabolite | | melatonin | Yes | melatonin |
| Tryptophan Metabolism | KEGG | map00380 | Tryptophan Metabolism | Metabolite | | 5-htp | No | nan |
| Tryptophan Metabolism | KEGG | map00380 | Tryptophan Metabolism | Metabolite | | kynurenic acid | No | nan |
| Tryptophan Metabolism | KEGG | map00380 | Tryptophan Metabolism | Metabolite | | niacin | Yes | niacin |
| Tryptophan Metabolism | KEGG | map00380 | Tryptophan Metabolism | Microbiome | | lactobacillus | Yes | lactobacillus |
| Tryptophan Metabolism | KEGG | map00380 | Tryptophan Metabolism | Microbiome | | bifidobacterium | Yes | bifidobacterium |
| Tryptophan Metabolism | KEGG | map00380 | Tryptophan Metabolism | Microbiome | | clostridium | Yes | clostridium |

**Entity recall was computed as the proportion of reference pathway markers detected in the DMH-KG.*
